### Reply to Baker and Holtom

TO THE EDITOR—We thank Drs Baker and Holtom [1] for their thoughtful comments on the low number of smear-negative, culture-positive tuberculosis cases in our study [2] and another recent study [3] of the GeneXpert MTB/RIF assay (Xpert). They astutely point out that this may have led us to underestimate the potential benefit of Xpert in low-burden settings. We agree that the incremental sensitivity of Xpert in sputum smear-negative patients is an area of added benefit of Xpert; as noted, multiple studies show that Xpert can detect more than half of all smear-negative tuberculosis patients in low-burden settings [4]. However, a single sputum Xpert will miss some cases of smear-negative tuberculosis, and in another recent study from Montreal, the sensitivity of Xpert was only 28% (95% confidence interval, 10%–56%) in this population [5]. This raises the concern that the spectrum of paucibacillary disease could be well below the threshold of Xpert detection in some settings, such as when those undergoing Xpert are

identified through active case finding [6]. We fully agree with Baker and Holtom that the value of a positive result in this setting is high, but to better understand the negative predictive value of Xpert and to better inform revised hospital tuberculosis infection control policies, additional high-quality data are needed on Xpert sensitivity among smear-negative patients, on the number of Xpert tests needed to detect smear-negative tuberculosis, and on the incremental cost-benefit ratio of serial Xpert testing.

In addition, Xpert offers at least 2 other potential clinical benefits in low-burden settings, which we were unable to evaluate because the relevant clinical scenarios did not occur in our population during the study. These include the use of Xpert as an add-on test to exclude tuberculosis among patients testing sputum microscopy positive for acid-fast bacilli due to other pathogens, such as nontuberculosis mycobacteria; and the use of Xpert as a screening test for multidrug-resistant tuberculosis. All of these additional potential benefits, combined with the high accuracy, rapid turnaround time, and cost savings for smear-positive tuberculosis demonstrated in the studies [1, 2, 3, 7], make Xpert a valuable tool in low-burden settings.

### Note

**Potential conflict of interest.** Both authors: No reported conflicts.

Both authors have submitted the ICMJE Form for Disclosure of Potential Conflicts of Interest. Conflicts that the editors consider relevant to the content of the manuscript have been disclosed.

**Lelia H. Chaisson<sup>1,3</sup> and J. Lucian Davis<sup>1,2,3</sup>**

<sup>1</sup>Division of Pulmonary and Critical Care Medicine,

<sup>2</sup>Curry International Tuberculosis Center, and

<sup>3</sup>Department of Medicine, San Francisco General Hospital, University of California

### References

1. Baker BJ, Holtom PD. Additional benefits of GeneXpert MTB/RIF assay for the evaluation of pulmonary tuberculosis among inpatients. *Clin Infect Dis* 2015; 60:1287–8.
2. Chaisson LH, Roemer M, Cantu D, et al. Impact of GeneXpert MTB/RIF assay on triage of

- respiratory isolation rooms for inpatients with presumed tuberculosis: a hypothetical trial. *Clin Infect Dis* **2014**; 59:1353–60.
3. Lippincott CK, Miller MB, Popowitch EB, Hanrahan CF, Van Rie A. Xpert MTB/RIF assay shortens airborne isolation for hospitalized patients with presumptive tuberculosis in the United States. *Clin Infect Dis* **2014**; 59: 186–92.
  4. Steingart KR, Schiller I, Horne DJ, Pai M, Boehme CC, Dendukuri N. Xpert(R) MTB/RIF assay for pulmonary tuberculosis and rifampicin resistance in adults. *Cochrane Database Syst Rev* **2014**; 1:CD009593.
  5. Sohn H, Aero AD, Menzies D, et al. Xpert MTB/RIF testing in a low tuberculosis incidence, high-resource setting: limitations in accuracy and clinical impact. *Clin Infect Dis* **2014**; 58:970–6.
  6. Mulherin SA, Miller WC. Spectrum bias or spectrum effect? Subgroup variation in diagnostic test evaluation. *Ann Intern Med* **2002**; 137:598–602.
  7. Millman AJ, Dowdy DW, Miller CR, et al. Rapid molecular testing for TB to guide respiratory isolation in the U.S.: a cost-benefit analysis. *PLoS One* **2013**; 8:e79669.

Correspondence: J. Lucian Davis, MD, MAS, San Francisco General Hospital, Room 5K1, 1001 Potrero Ave, San Francisco, CA 94110 (lucian.davis@ucsf.edu).

**Clinical Infectious Diseases® 2015;60(8):1288–9**

© The Author 2015. Published by Oxford University Press on behalf of the Infectious Diseases Society of America. All rights reserved. For Permissions, please e-mail: journals.permissions@oup.com.

DOI: 10.1093/cid/civ008
